# Supplementary material for: Genome-wide expression profiling of maize in response to individual and combined water and nitrogen stresses
Source: Springer Nature journal article supplement (doi:10.1186/1471-2164-14-3), 2013-01-16

## Leaf (2969 data points mapped out of 4476, 492 visible)

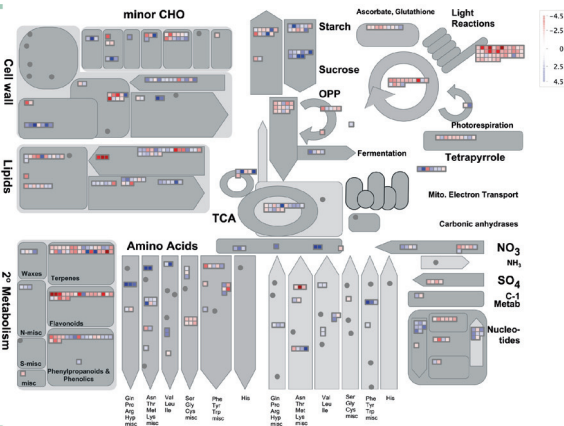

## Root (3601 data points mapped out of 5401, 525 visible)

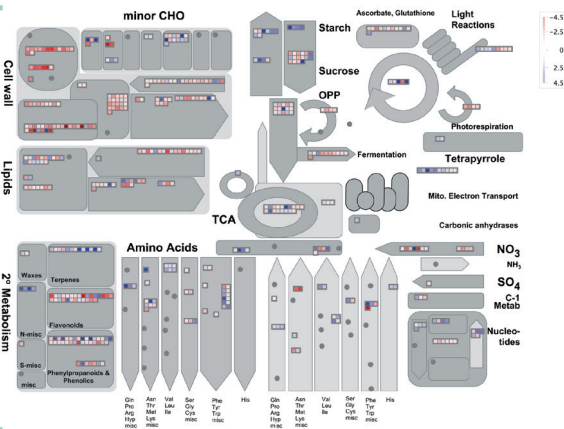

## Stem (5121 data points mapped out of 7843, 715 visible)

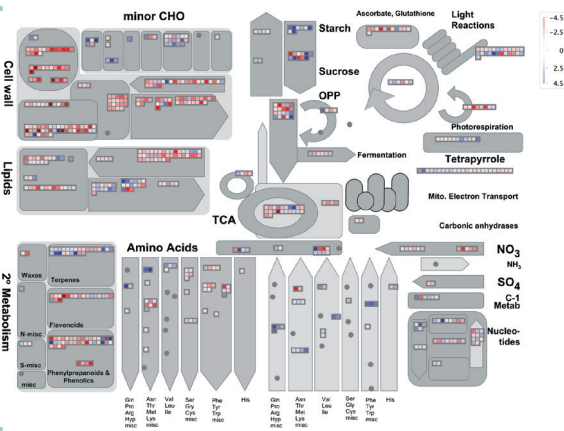

Supplement: 12864_2012_4725_MOESM6_ESM.pdf [file 12864_2012_4725_MOESM6_ESM.pdf]
